# Supplementary material
Source: MDPI journal article supplement (https://www.mdpi.com/2073-4395/12/6/1332)
Supplement: s1 [file s1]

Archive with 3 entries (3 files):
- Supporting Figure S1.pdf
- Supporting Table S1.pdf
- Supporting Table S2.pdf
