# Supplementary material
Source: MDPI journal article supplement (https://www.mdpi.com/2073-4395/12/6/1332)
Supplement: s1 [file s1]

**Table S1.** List of primers used for semi-quantitative RT-PCR and quantitative real-time PCR analysis

| <b>Primers used for semi-quantitative RT-PCR analysis</b>   |                               |                                |
|-------------------------------------------------------------|-------------------------------|--------------------------------|
| <b>Gene name</b>                                            | <b>Forward primer (5'-3')</b> | <b>Reverse primer (5'-3')</b>  |
| <i>OsActin1</i>                                             | GGAAGTGGTATGGTCAAGGC          | AGTCTCATGGATAACCGCAG           |
| <i>OsPht1;4</i>                                             | ATCGTGGAGGAGCAGGAGAAGG        | CATCGTCATCGTCCTCGTTCTC         |
| <b>Primers used for quantitative real-time PCR analysis</b> |                               |                                |
| <i>OsActin1</i>                                             | GGGTTTCAAGTCTGCCTATTGT        | ACGGGACACGACCAAGGA             |
| <i>OsPht1;2</i>                                             | GACGAGACCGCCCAAGAAG           | TTTTCAGTCACTCACGTCGAGAC        |
| <i>OsPht1;4</i>                                             | TTCTGCTAGTGTACCAAACAAAATTACA  | TAAGTGGCATTTATAATATCAACAGTAACC |
| <i>OsPht1;6</i>                                             | CCGCCCCTGCAAACTGTA            | GAACTGGCGGTTTCTTCGAT           |
| <i>OsPht1;8</i>                                             | AGAAGGCAAAGAAATGTGTGTTAAAT    | AAAATGTATTCGTGCCAAATTGCT       |
| <i>OsPht1;10</i>                                            | ATGTCGCCCATCCTTCCA            | TCGCTTTCCGACGATGATC            |
