# Supplementary material
Source: MDPI journal article supplement (https://www.mdpi.com/2073-4395/12/6/1332)
Supplement: s1 [file s1]

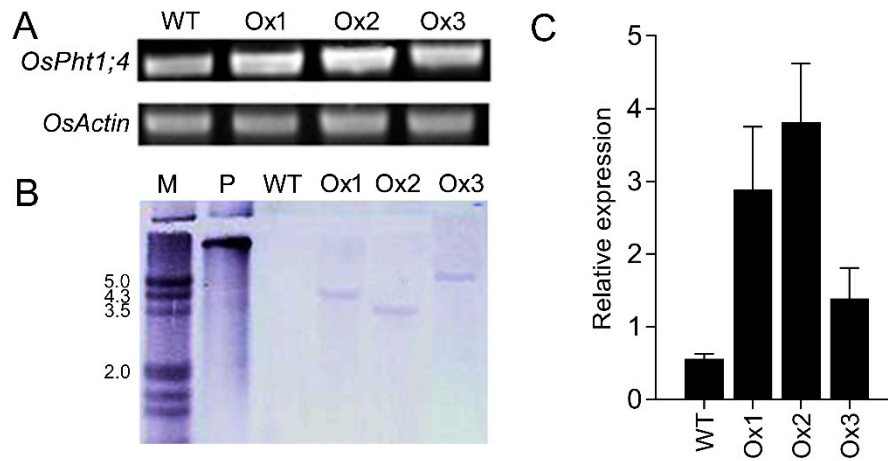

**Figure S1:** Identification of *OsPHT1;4* Overexpressing Lines in WYJ7. WT and *OsPHT1;4*-Ox lines (Ox1-Ox3) were grown hydroponically in + P medium for 3 weeks. **(A)** Semi-quantitative RT-PCR was used to determine the transcript levels of *OsPHT1;4* in the roots of WT and Ox1 to Ox3 plants. *OsActin1* was used as an internal control. **(B)** Genomic DNAs of WT and Ox1- Ox3 plants were digested with BamHI and XhoI for Southern blot with the hygromycin gene as the probe. M = marker, P = Positive control of the pTCK303 plasmid. **(C)** quantitative RT-PCR was used to determine the transcript levels of *OsPHT1;4* in the Shoots of WT and Ox1 to Ox3 plants. *OsActin1* was used as an internal control. Values are means  $\pm$  SE (n = 3).
