# Supplementary material
Source: MDPI journal article supplement (https://www.mdpi.com/2073-4395/12/6/1332)
Supplement: s1 [file s1 › Supporting Table S2.pdf]

**Table S2.** Primers used for vector construction

| Name                                  |    | Primers (5'-3')                  |
|---------------------------------------|----|----------------------------------|
| <i>OsPht1;4</i> promoter:: <i>GUS</i> | FP | GCGCTTAATTAATGGAGAACTTATCCCTTCGG |
|                                       | RP | ATAAGGCGCGCCGGCGCCAATCTCAGCTACT  |
| <i>OsPht1;4</i> -Ox                   | FP | AACCTAGGATGGCCGGCGAGCTCAAGGT     |
|                                       | RP | AACTCGAGTCAAGCTGGCGGCGCCGGCG     |
